# Supplementary material for: Human Chemical Exposure from Background Emissions in the United States and the Implication for Quantifying Risks from Marginal Emission Increase
Source: MDPI journal article supplement (doi:10.3390/toxics9110308), 2021-11-15
Supplement: s1 [file s1]

# Supplementary Materials: Human chemical exposure from background emissions in the United States and the implication for quantifying risks from marginal emission increase

Dingsheng and Li Li

**Table S1.** Emission amounts reported by NEI in 2011, 2014, and 2017 for the 95 organic chemicals analyzed in this study.

| CASRN     | Name                         | Total emission (kg) <sup>a</sup> |            |            |
|-----------|------------------------------|----------------------------------|------------|------------|
|           |                              | 2011                             | 2014       | 2017       |
| 100-41-4  | Ethyl Benzene                | 7.44E + 07                       | 7.00E + 07 | 5.36E + 07 |
| 100-42-5  | Styrene                      | 1.91E + 07                       | 2.35E + 07 | 2.14E + 07 |
| 106-46-7  | 1,4-Dichlorobenzene          | 1.65E + 06                       | 1.15E + 06 | 2.84E + 05 |
| 106-88-7  | 1,2-Epoxybutane              | 8.45E + 03                       | 1.61E + 04 | 9.40E + 03 |
| 106-89-8  | Epichlorohydrin              | 3.55E + 04                       | 3.49E + 04 | 5.60E + 04 |
| 106-93-4  | Ethylene Dibromide           | 2.05E + 04                       | 1.72E + 04 | 1.99E + 04 |
| 106-99-0  | 1,3-Butadiene                | 2.12E + 07                       | 1.94E + 07 | 1.51E + 07 |
| 107-02-8  | Acrolein                     | 1.02E + 07                       | 1.17E + 07 | 1.01E + 07 |
| 107-05-1  | Allyl Chloride               | 2.28E + 04                       | 1.41E + 04 | 1.28E + 04 |
| 107-13-1  | Acrylonitrile                | 3.18E + 05                       | 3.32E + 05 | 2.65E + 05 |
| 107-21-1  | Ethylene Glycol              | 6.22E + 07                       | 6.63E + 07 | 4.11E + 07 |
| 108-05-4  | Vinyl Acetate                | 7.77E + 05                       | 7.32E + 05 | 5.95E + 05 |
| 108-10-1  | Methyl Isobutyl Ketone       | 2.54E + 07                       | 8.42E + 06 | 8.03E + 06 |
| 108-31-6  | Maleic Anhydride             | 1.33E + 05                       | 1.26E + 05 | 1.19E + 05 |
| 108-39-4  | m-Cresol                     | 6.34E + 03                       | 8.52E + 03 | 9.87E + 03 |
| 108-88-3  | Toluene                      | 5.67E + 08                       | 4.33E + 08 | 3.48E + 08 |
| 108-90-7  | Chlorobenzene                | 8.16E + 05                       | 7.37E + 05 | 4.31E + 05 |
| 108-95-2  | Phenol                       | 8.43E + 06                       | 9.33E + 06 | 9.73E + 06 |
| 109-86-4  | Ethylene Glycol Methyl Ether | 3.03E + 04                       | 1.91E + 05 | 1.79E + 05 |
| 110-54-3  | Hexane                       | 2.44E + 08                       | 1.12E + 08 | 9.19E + 07 |
| 110-80-5  | Cellosolve Solvent           | 2.86E + 04                       | 1.34E + 04 | 2.99E + 03 |
| 114-26-1  | Propoxur                     | 7.35E + 00                       | 1.51E + 00 | 1.60E-01   |
| 117-81-7  | Bis(2-Ethylhexyl)Phthalate   | 1.58E + 05                       | 1.95E + 05 | 1.95E + 05 |
| 118-74-1  | Hexachlorobenzene            | 1.18E + 03                       | 1.44E + 03 | 1.24E + 03 |
| 120-12-7  | Anthracene                   | 2.43E + 05                       | 2.00E + 05 | 1.75E + 05 |
| 120-82-1  | 1,2,4-Trichlorobenzene       | 9.87E + 04                       | 1.05E + 05 | 1.01E + 05 |
| 121-14-2  | 2,4-Dinitrotoluene           | 4.33E + 03                       | 7.08E + 03 | 6.15E + 03 |
| 121-44-8  | Triethylamine                | 4.81E + 05                       | 1.82E + 05 | 1.70E + 05 |
| 121-69-7  | N,N-Dimethylaniline          | 8.14E + 03                       | 6.36E + 03 | 6.81E + 03 |
| 123-31-9  | Hydroquinone                 | 2.30E + 04                       | 2.46E + 04 | 3.89E + 04 |
| 127-18-4  | Tetrachloroethylene          | 1.11E + 07                       | 3.60E + 06 | 7.53E + 06 |
| 129-00-0  | Pyrene                       | 4.47E + 05                       | 3.64E + 05 | 4.72E + 05 |
| 133-06-2  | Captan                       | 1.01E + 02                       | 2.89E + 05 | 2.27E + 05 |
| 133-90-4  | Chloramben                   | 1.02E + 00                       | 3.00E − 02 | 2.00E − 02 |
| 1582-09-8 | Trifluralin                  | 2.20E + 06                       | 2.29E + 06 | 2.81E + 06 |
| 1634-04-4 | Methyl Tert-Butyl Ether      | 6.29E + 05                       | 3.14E + 05 | 2.10E + 05 |
| 206-44-0  | Fluoranthene                 | 4.23E + 05                       | 3.29E + 05 | 2.84E + 05 |
| 50-00-0   | Formaldehyde                 | 1.02E + 09                       | 9.98E + 08 | 6.56E + 08 |
| 510-15-6  | Chlorobenzilate              | 1.45E + 00                       | 1.94E + 01 | 2.18E + 01 |
| 51-28-5   | 2,4-Dinitrophenol            | 6.45E + 03                       | 1.26E + 03 | 6.04E + 03 |
| 532-27-4  | 2-Chloroacetophenone         | 3.08E + 03                       | 2.69E + 03 | 6.65E + 02 |
| 542-75-6  | 1,3-Dichloropropene          | 2.75E + 06                       | 1.74E + 06 | 1.91E + 05 |
| 56-23-5   | Carbon Tetrachloride         | 9.73E + 04                       | 9.25E + 04 | 1.70E + 05 |

|          |                                |            |            |            |
|----------|--------------------------------|------------|------------|------------|
| 56-38-2  | Parathion                      | 1.36E + 00 | 1.37E + 01 | 1.34E + 01 |
| 57-74-9  | Chlordane                      | 1.84E + 01 | 1.41E + 01 | 5.56E + 00 |
| 58-89-9  | 1,2,3,4,5,6-Hexachlorocy       | 3.04E + 02 | 1.99E + 00 | 2.83E + 01 |
| 593-60-2 | Vinyl Bromide                  | 7.74E + 01 | 7.09E + 01 | 4.64E + 01 |
| 62-53-3  | Aniline                        | 7.64E + 04 | 8.37E + 04 | 6.45E + 04 |
| 62-73-7  | Dichlorvos                     | 7.33E + 02 | 4.35E + 02 | 2.51E + 01 |
| 63-25-2  | Carbaryl                       | 1.77E + 04 | 3.17E + 05 | 3.53E + 05 |
| 67-56-1  | Methanol                       | 4.09E + 09 | 3.52E + 09 | 2.03E + 09 |
| 67-66-3  | Chloroform                     | 7.10E + 05 | 7.29E + 05 | 1.01E + 06 |
| 67-72-1  | Hexachloroethane               | 7.12E + 04 | 4.92E + 04 | 3.36E + 04 |
| 68-12-2  | N,N-Dimethylformamide          | 1.27E + 05 | 1.16E + 05 | 1.02E + 05 |
| 71-43-2  | Benzene                        | 1.64E + 08 | 1.49E + 08 | 1.21E + 08 |
| 71-55-6  | Methyl Chloroform              | 2.06E + 07 | 1.65E + 07 | 9.80E + 06 |
| 72-43-5  | Methoxychlor                   | 2.18E + 01 | 1.43E + 01 | 6.56E + 00 |
| 74-83-9  | Methyl Bromide                 | 5.59E + 06 | 4.15E + 06 | 9.42E + 05 |
| 74-87-3  | Methyl Chloride                | 7.75E + 05 | 1.99E + 06 | 1.26E + 06 |
| 75-00-3  | Ethyl Chloride                 | 1.71E + 05 | 2.40E + 05 | 2.38E + 05 |
| 75-01-4  | Vinyl Chloride                 | 3.21E + 05 | 3.86E + 05 | 3.87E + 05 |
| 75-05-8  | Acetonitrile                   | 3.93E + 05 | 4.53E + 05 | 7.19E + 05 |
| 75-07-0  | Acetaldehyde                   | 7.18E + 08 | 6.95E + 08 | 4.47E + 08 |
| 75-09-2  | Methylene Chloride             | 7.92E + 06 | 6.47E + 06 | 3.15E + 06 |
| 75-15-0  | Carbon Disulfide               | 4.31E + 06 | 4.64E + 06 | 4.13E + 06 |
| 75-25-2  | Bromoform                      | 3.07E + 04 | 3.10E + 04 | 1.60E + 04 |
| 75-35-4  | Vinylidene Chloride            | 3.36E + 04 | 2.76E + 04 | 1.70E + 04 |
| 75-56-9  | Propylene Oxide                | 3.57E + 05 | 2.87E + 05 | 2.49E + 05 |
| 76-44-8  | Heptachlor                     | 5.34E + 00 | 4.32E + 00 | 2.77E + 00 |
| 77-47-4  | Hexachlorocyclopentadiene      | 1.63E + 04 | 1.10E + 04 | 6.65E + 03 |
| 78-59-1  | Isophorone                     | 2.96E + 05 | 2.91E + 05 | 1.42E + 05 |
| 78-87-5  | Propylene Dichloride           | 5.26E + 04 | 3.41E + 04 | 3.26E + 04 |
| 79-00-5  | 1,1,2-Trichloroethane          | 4.35E + 04 | 3.67E + 04 | 6.89E + 04 |
| 79-06-1  | Acrylamide                     | 1.46E + 04 | 9.38E + 03 | 1.75E + 04 |
| 79-10-7  | Acrylic Acid                   | 1.31E + 05 | 1.32E + 05 | 1.54E + 05 |
| 79-46-9  | 2-Nitropropane                 | 2.79E + 04 | 1.55E + 04 | 1.46E + 04 |
| 80-62-6  | Methyl Methacrylate            | 9.90E + 05 | 1.42E + 06 | 1.16E + 06 |
| 82-68-8  | Pentachloronitrobenzene        | 2.07E + 03 | 6.60E + 01 | 6.72E + 01 |
| 83-32-9  | Acenaphthene                   | 2.11E + 05 | 2.36E + 05 | 2.41E + 05 |
| 84-74-2  | Dibutyl Phthalate              | 5.97E + 04 | 6.30E + 04 | 5.99E + 04 |
| 85-44-9  | Phthalic Anhydride             | 8.70E + 04 | 1.05E + 05 | 1.16E + 05 |
| 86-73-7  | Fluorene                       | 4.50E + 05 | 4.60E + 05 | 5.33E + 05 |
| 87-86-5  | Pentachlorophenol              | 2.96E + 03 | 2.67E + 03 | 2.07E + 03 |
| 91-20-3  | Naphthalene                    | 1.09E + 07 | 1.57E + 07 | 1.35E + 07 |
| 91-57-6  | 2-Methylnaphthalene            | 5.41E + 04 | 5.10E + 05 | 2.51E + 05 |
| 92-52-4  | Biphenyl                       | 2.35E + 05 | 2.79E + 05 | 2.21E + 05 |
| 92-87-5  | Benzidine                      | 1.38E + 02 | 8.72E + 02 | 7.12E + 03 |
| 94-75-7  | 2,4-Dichlorophenoxyacetic Acid | 1.27E + 07 | 4.04E + 02 | 7.90E + 06 |
| 95-48-7  | o-Cresol                       | 3.88E + 04 | 2.64E + 04 | 3.83E + 04 |
| 95-95-4  | 2,4,5-Trichlorophenol          | 7.22E + 03 | 7.44E + 03 | 9.58E + 03 |
| 96-12-8  | 1,2-Dibromo-3-Chloropropane    | 2.04E + 02 | 2.25E + 02 | 1.66E + 02 |
| 96-45-7  | Ethylene Thiourea              | 2.85E + 02 | 6.06E + 02 | 1.67E + 02 |
| 98-82-8  | Cumene                         | 9.13E + 05 | 8.37E + 05 | 9.16E + 05 |
| 98-86-2  | Acetophenone                   | 1.49E + 05 | 1.63E + 05 | 1.84E + 05 |
| 98-95-3  | Nitrobenzene                   | 2.74E + 04 | 1.24E + 04 | 1.16E + 04 |

a. From 2011, 2014, and 2017 National Emission Inventory.

Table S2. Chemical analyzed and relevant data used in this study.

| 0        | Name                     | Total emission (kg) <sup>a</sup> | ED50,inhalation (mg <sub>chemical</sub> /kg <sub>body-weight</sub> /d) <sup>b</sup> | ED50,ingestion (mg <sub>chemical</sub> /kg <sub>body-weight</sub> /d) <sup>b</sup> | Dissociation, pK <sub>a</sub> <sup>c</sup> | Dissociation, pK <sub>b</sub> <sup>c</sup> | log K <sub>ow</sub> <sup>c</sup> | log K <sub>OA</sub> <sup>c</sup> | log k <sub>(OH)</sub> <sup>c</sup> | Half-life of biodegradation in the environment (day) <sup>c, d</sup> | Half-life of biotransformation in fish (day) <sup>c</sup> | Half-life of biotransformation in human (day) <sup>c</sup> |
|----------|--------------------------|----------------------------------|-------------------------------------------------------------------------------------|------------------------------------------------------------------------------------|--------------------------------------------|--------------------------------------------|----------------------------------|----------------------------------|------------------------------------|----------------------------------------------------------------------|-----------------------------------------------------------|------------------------------------------------------------|
| 100-41-4 | Ethyl Benzene            | 5.36E + 07                       | 7.25E + 02                                                                          | 1.07E + 02                                                                         | NaN                                        | NaN                                        | 3.15E + 00                       | 3.71E + 00                       | -1.12E + 01                        | 1.14E + 01                                                           | -2.18E - 01                                               | 6.77E - 01                                                 |
| 100-42-5 | Styrene                  | 2.14E + 07                       | 2.84E + 01                                                                          | 6.12E + 02                                                                         | NaN                                        | NaN                                        | 2.95E + 00                       | 3.84E + 00                       | -1.02E + 01                        | 1.07E + 01                                                           | -3.17E - 01                                               | -7.60E - 01                                                |
| 106-46-7 | 1,4-Dichlorobenzene      | 2.84E + 05                       | 1.25E + 02                                                                          | 1.25E + 02                                                                         | NaN                                        | NaN                                        | 3.44E + 00                       | 4.44E + 00                       | -1.25E + 01                        | 3.20E + 01                                                           | 8.61E - 01                                                | 1.96E - 01                                                 |
| 106-88-7 | 1,2-Epoxybutane          | 9.40E + 03                       | 2.00E + 00                                                                          | 2.00E + 00                                                                         | NaN                                        | NaN                                        | 6.80E - 01                       | 2.76E + 00                       | -1.17E + 01                        | 1.35E + 01                                                           | -6.72E - 01                                               | -4.19E - 01                                                |
| 106-89-8 | Epichlorohydrin          | 5.60E + 04                       | 6.02E - 01                                                                          | 6.02E - 01                                                                         | NaN                                        | NaN                                        | 4.50E - 01                       | 3.09E + 00                       | -1.24E + 01                        | 1.85E + 01                                                           | -9.46E - 01                                               | -6.95E - 02                                                |
| 106-93-4 | Ethylene Dibromide       | 1.99E + 04                       | 5.94E + 01                                                                          | 5.94E + 01                                                                         | NaN                                        | NaN                                        | 1.96E + 00                       | 3.60E + 00                       | -1.26E + 01                        | 2.17E + 01                                                           | -6.12E - 01                                               | -1.56E - 01                                                |
| 106-99-0 | 1,3-Butadiene            | 1.51E + 07                       | 3.31E + 00                                                                          | 3.31E + 00                                                                         | NaN                                        | NaN                                        | 1.99E + 00                       | 1.76E + 00                       | -1.02E + 01                        | 9.79E + 00                                                           | -6.87E - 01                                               | -9.06E - 01                                                |
| 107-02-8 | Acrolein                 | 1.01E + 07                       | 4.68E - 03                                                                          | 1.10E - 01                                                                         | NaN                                        | NaN                                        | -1.00E - 02                      | 2.20E + 00                       | -1.07E + 01                        | 7.44E + 00                                                           | -6.55E - 01                                               | -9.06E - 01                                                |
| 107-05-1 | Allyl Chloride           | 1.28E + 04                       | 3.01E + 00                                                                          | 3.01E + 00                                                                         | NaN                                        | NaN                                        | 1.55E + 00                       | 2.08E + 00                       | -1.08E + 01                        | 1.47E + 01                                                           | -6.83E - 01                                               | -4.73E - 01                                                |
| 107-13-1 | Acrylonitrile            | 2.65E + 05                       | 7.93E - 01                                                                          | 7.93E - 01                                                                         | NaN                                        | NaN                                        | 2.50E - 01                       | 2.47E + 00                       | -1.10E + 01                        | 1.19E + 01                                                           | -6.63E - 01                                               | -6.82E - 01                                                |
| 107-21-1 | Ethylene Glycol          | 4.11E + 07                       | 4.40E + 02                                                                          | 4.40E + 02                                                                         | 1.10E + 01                                 | NaN                                        | -1.36E + 00                      | 5.45E + 00                       | -1.08E + 01                        | 8.00E + 00                                                           | -1.39E + 00                                               | -1.11E + 00                                                |
| 108-05-4 | Vinyl Acetate            | 5.95E + 05                       | 8.35E + 00                                                                          | 8.35E + 00                                                                         | NaN                                        | NaN                                        | 7.30E - 01                       | 2.58E + 00                       | -1.06E + 01                        | 8.06E + 00                                                           | -8.76E - 01                                               | -1.25E + 00                                                |
| 108-10-1 | Methyl Isobutyl Ketone   | 8.03E + 06                       | 1.71E + 03                                                                          | 1.71E + 03                                                                         | NaN                                        | NaN                                        | 1.31E + 00                       | 3.57E + 00                       | -1.09E + 01                        | 1.17E + 01                                                           | -7.67E - 01                                               | -1.24E + 00                                                |
| 108-31-6 | Maleic Anhydride         | 1.19E + 05                       | 2.20E + 01                                                                          | 2.20E + 01                                                                         | NaN                                        | NaN                                        | 5.98E - 01                       | 4.95E + 00                       | -1.18E + 01                        | 1.71E + 01                                                           | -7.00E - 01                                               | -1.30E + 00                                                |
| 108-39-4 | m-Cresol                 | 9.87E + 03                       | 5.50E + 01                                                                          | 5.50E + 01                                                                         | 1.02E + 01                                 | NaN                                        | 1.96E + 00                       | 5.73E + 00                       | -1.02E + 01                        | 1.53E + 01                                                           | -8.07E - 01                                               | -1.22E + 00                                                |
| 108-88-3 | Toluene                  | 3.48E + 08                       | 7.68E + 01                                                                          | 2.45E + 02                                                                         | NaN                                        | NaN                                        | 2.73E + 00                       | 3.40E + 00                       | -1.12E + 01                        | 1.80E + 01                                                           | -4.96E - 01                                               | -8.07E - 01                                                |
| 108-90-7 | Chlorobenzene            | 4.31E + 05                       | 5.81E + 01                                                                          | 5.81E + 01                                                                         | NaN                                        | NaN                                        | 2.84E + 00                       | 3.56E + 00                       | -1.21E + 01                        | 1.82E + 01                                                           | -4.90E - 01                                               | -3.27E - 01                                                |
| 108-95-2 | Phenol                   | 9.73E + 06                       | 8.49E + 01                                                                          | 8.49E + 01                                                                         | 1.00E + 01                                 | NaN                                        | 1.46E + 00                       | 5.56E + 00                       | -1.06E + 01                        | 5.00E + 00                                                           | -9.02E - 01                                               | 5.67E - 01                                                 |
| 109-86-4 | Ethylene Glycol Methyl E | 1.79E + 05                       | 1.42E + 01                                                                          | 1.42E + 01                                                                         | 1.16E + 01                                 | NaN                                        | -7.70E - 01                      | 4.03E + 00                       | -1.09E + 01                        | 1.15E + 01                                                           | -1.27E + 00                                               | -1.06E + 00                                                |
| 110-54-3 | Hexane                   | 9.19E + 07                       | 3.05E + 01                                                                          | 3.05E + 01                                                                         | NaN                                        | NaN                                        | 3.90E + 00                       | 2.30E + 00                       | -1.13E + 01                        | 7.48E + 00                                                           | -2.13E - 01                                               | -7.40E - 01                                                |
| 110-80-5 | Cellosolve Solvent       | 2.99E + 03                       | 5.68E + 01                                                                          | 5.68E + 01                                                                         | 1.03E + 01                                 | NaN                                        | -3.20E - 01                      | 4.32E + 00                       | -1.08E + 01                        | 1.19E + 01                                                           | -1.22E + 00                                               | -9.25E - 01                                                |
| 114-26-1 | Propoxur                 | 1.60E - 01                       | 1.80E + 00                                                                          | 1.80E + 00                                                                         | 6.81E + 00                                 | NaN                                        | 1.52E + 00                       | 8.82E + 00                       | -1.07E + 01                        | 2.18E + 01                                                           | -1.02E + 00                                               | -1.48E + 00                                                |
| 117-81-7 | Bis(2-Ethylhexyl)Phthala | 1.95E + 05                       | 6.87E + 00                                                                          | 6.87E + 00                                                                         | NaN                                        | NaN                                        | 7.60E + 00                       | 1.21E + 01                       | -1.07E + 01                        | 4.80E + 00                                                           | 5.15E - 01                                                | -1.29E - 01                                                |
| 118-74-1 | Hexachlorobenzene        | 1.24E + 03                       | 2.75E + 00                                                                          | 2.75E + 00                                                                         | NaN                                        | NaN                                        | 5.73E + 00                       | 7.36E + 00                       | -1.36E + 01                        | 5.84E + 02                                                           | 1.77E + 00                                                | 4.39E + 00                                                 |
| 120-12-7 | Anthracene               | 1.75E + 05                       | 6.18E + 02                                                                          | 6.18E + 02                                                                         | NaN                                        | NaN                                        | 4.45E + 00                       | 7.32E + 00                       | -9.75E + 00                        | 5.47E + 01                                                           | 1.46E - 01                                                | -6.75E - 01                                                |
| 120-82-1 | 1,2,4-Trichlorobenzene   | 1.01E + 05                       | 3.25E + 01                                                                          | 3.25E + 01                                                                         | NaN                                        | NaN                                        | 4.02E + 00                       | 5.11E + 00                       | -1.23E + 01                        | 6.10E + 01                                                           | 1.06E + 00                                                | 7.33E - 02                                                 |
| 121-14-2 | 2,4-Dinitrotoluene       | 6.15E + 03                       | 1.22E + 00                                                                          | 1.22E + 00                                                                         | NaN                                        | NaN                                        | 1.98E + 00                       | 6.36E + 00                       | -1.22E + 01                        | 1.04E + 02                                                           | -4.19E - 01                                               | 3.03E - 01                                                 |
| 121-44-8 | Triethylamine            | 1.70E + 05                       | 1.63E + 01                                                                          | 1.63E + 01                                                                         | NaN                                        | 1.06E + 01                                 | 1.45E + 00                       | 3.42E + 00                       | -1.03E + 01                        | 2.90E + 01                                                           | -2.32E - 01                                               | -5.55E - 01                                                |
| 121-69-7 | N,N-Dimethylaniline      | 6.81E + 03                       | 3.45E + 00                                                                          | 3.45E + 00                                                                         | NaN                                        | 5.30E + 00                                 | 2.31E + 00                       | 4.69E + 00                       | -9.83E + 00                        | 2.57E + 01                                                           | -8.75E - 01                                               | -7.53E - 01                                                |
| 123-31-9 | Hydroquinone             | 3.89E + 04                       | 1.32E + 01                                                                          | 1.32E + 01                                                                         | 9.92E + 00                                 | NaN                                        | 5.90E - 01                       | 8.45E + 00                       | -1.06E + 01                        | 1.20E + 01                                                           | -9.61E - 01                                               | -8.72E - 01                                                |
| 127-18-4 | Tetrachloroethylene      | 7.53E + 06                       | 8.65E + 00                                                                          | 8.65E + 00                                                                         | NaN                                        | NaN                                        | 3.40E + 00                       | 3.53E + 00                       | -1.28E + 01                        | 5.16E + 01                                                           | -3.88E - 01                                               | 1.13E + 00                                                 |
| 129-00-0 | Pyrene                   | 4.72E + 05                       | 4.64E + 01                                                                          | 4.64E + 01                                                                         | NaN                                        | NaN                                        | 4.88E + 00                       | 8.52E + 00                       | -1.03E + 01                        | 1.66E + 02                                                           | 3.56E - 01                                                | -4.59E - 01                                                |

|           |                           |            |            |            |            |            |             |            |             |            |             |             |
|-----------|---------------------------|------------|------------|------------|------------|------------|-------------|------------|-------------|------------|-------------|-------------|
| 133-06-2  | Captan                    | 2.27E + 05 | 2.75E + 01 | 2.75E + 01 | NaN        | 2.07E + 00 | 2.80E + 00  | 9.09E + 00 | -1.03E + 01 | 1.53E + 02 | -1.86E - 02 | 5.05E - 01  |
| 133-90-4  | Chloramben                | 2.00E - 02 | 4.64E + 00 | 4.64E + 00 | 3.12E + 00 | NaN        | 1.41E + 00  | 9.39E + 00 | -1.12E + 01 | 6.29E + 01 | -1.03E + 00 | 1.37E - 01  |
| 1582-09-8 | Trifluralin               | 2.81E + 06 | 4.59E + 00 | 4.59E + 00 | NaN        | 2.84E + 00 | 5.34E + 00  | 8.07E + 00 | -1.07E + 01 | 6.61E + 02 | 8.65E - 02  | -7.39E - 01 |
| 1634-04-4 | Methyl Tert-Butyl Ether   | 2.10E + 05 | 4.33E + 02 | 4.33E + 02 | NaN        | NaN        | 9.40E - 01  | 2.62E + 00 | -1.15E + 01 | 3.07E + 01 | -6.96E - 01 | -8.93E - 01 |
| 206-44-0  | Fluoranthene              | 2.84E + 05 | 7.73E + 01 | 7.73E + 01 | NaN        | NaN        | 5.05E + 00  | 8.85E + 00 | -1.02E + 01 | 3.06E + 02 | -1.88E - 02 | -8.93E - 01 |
| 50-00-0   | Formaldehyde              | 6.56E + 08 | 3.30E + 01 | 3.30E + 01 | NaN        | NaN        | 3.50E - 01  | 3.21E + 00 | -1.11E + 01 | 6.47E + 00 | -7.62E - 01 | -1.08E + 00 |
| 510-15-6  | Chlorobenzilate           | 2.18E + 01 | 4.40E + 00 | 4.40E + 00 | 8.31E + 00 | NaN        | 4.74E + 00  | 1.05E + 01 | -1.11E + 01 | 9.60E + 01 | 6.45E - 01  | 3.21E - 01  |
| 51-28-5   | 2,4-Dinitrophenol         | 6.04E + 03 | 4.50E + 00 | 4.50E + 00 | 4.85E + 00 | NaN        | 1.67E + 00  | 7.23E + 00 | -1.21E + 01 | 7.28E + 01 | -9.91E - 01 | -1.05E + 00 |
| 532-27-4  | 2-Chloroacetophenone      | 6.65E + 02 | 1.25E - 02 | 1.25E - 02 | NaN        | NaN        | 1.84E + 00  | 5.38E + 00 | -1.17E + 01 | 1.77E + 01 | -5.33E - 01 | -6.23E - 01 |
| 542-75-6  | 1,3-Dichloropropene       | 1.91E + 05 | 2.67E - 02 | 4.11E + 00 | NaN        | NaN        | 2.03E + 00  | 2.98E + 00 | -1.10E + 01 | 2.10E + 01 | -4.85E - 01 | 6.12E - 02  |
| 56-23-5   | Carbon Tetrachloride      | 1.70E + 05 | 7.81E - 01 | 7.81E - 01 | NaN        | NaN        | 2.83E + 00  | 2.78E + 00 | -1.59E + 01 | 1.04E + 02 | -5.43E - 01 | 1.03E + 00  |
| 56-38-2   | Parathion                 | 1.34E + 01 | 8.99E - 01 | 8.99E - 01 | 6.60E + 00 | NaN        | 3.83E + 00  | 9.04E + 00 | -1.04E + 01 | 3.55E + 01 | -1.81E - 01 | 5.79E - 02  |
| 57-74-9   | Chlordane                 | 5.56E + 00 | 5.43E - 01 | 1.10E - 01 | NaN        | NaN        | 6.22E + 00  | 8.96E + 00 | -1.17E + 01 | 2.14E + 03 | 2.04E + 00  | 3.32E + 00  |
| 58-89-9   | 1,2,3,4,5,6-Hexachlorocy  | 2.83E + 01 | 3.63E - 01 | 3.63E - 01 | NaN        | NaN        | 4.14E + 00  | 7.95E + 00 | -1.27E + 01 | 1.83E + 02 | 1.51E + 00  | 3.30E + 00  |
| 593-60-2  | Vinyl Bromide             | 4.64E + 01 | 3.22E + 00 | 3.22E + 00 | NaN        | NaN        | 1.57E + 00  | 2.16E + 00 | -1.12E + 01 | 1.35E + 01 | -5.63E - 01 | -5.31E - 01 |
| 62-53-3   | Aniline                   | 6.45E + 04 | 2.84E + 00 | 2.84E + 00 | NaN        | 4.50E + 00 | 9.00E - 01  | 4.96E + 00 | -9.95E + 00 | 2.39E + 01 | -9.50E - 01 | -8.62E - 01 |
| 62-73-7   | Dichlorvos                | 2.51E + 01 | 8.35E - 02 | 3.60E - 01 | NaN        | NaN        | 1.43E + 00  | 6.07E + 00 | -1.05E + 01 | 2.43E + 01 | -1.72E - 01 | 5.99E - 01  |
| 63-25-2   | Carbaryl                  | 3.53E + 05 | 4.64E + 00 | 4.64E + 00 | 8.14E + 00 | NaN        | 2.36E + 00  | 9.18E + 00 | -1.07E + 01 | 2.64E + 01 | -1.05E + 00 | -8.41E - 01 |
| 67-56-1   | Methanol                  | 2.03E + 09 | 5.50E + 02 | 5.50E + 02 | 1.03E + 01 | NaN        | -7.70E - 01 | 2.91E + 00 | -1.20E + 01 | 7.42E + 00 | -1.35E + 00 | -1.06E + 00 |
| 67-66-3   | Chloroform                | 1.01E + 06 | 8.61E + 00 | 8.61E + 00 | NaN        | NaN        | 1.97E + 00  | 2.77E + 00 | -1.30E + 01 | 3.94E + 01 | -3.73E - 01 | 2.19E - 01  |
| 67-72-1   | Hexachloroethane          | 3.36E + 04 | 1.10E + 00 | 1.10E + 00 | NaN        | NaN        | 4.14E + 00  | 4.70E + 00 | -1.43E + 01 | 4.31E + 02 | 6.76E - 01  | 2.10E + 00  |
| 68-12-2   | N,N-Dimethylformamide     | 1.02E + 05 | 3.30E + 00 | 3.30E + 00 | NaN        | 4.04E + 00 | -1.01E + 00 | 4.33E + 00 | -1.09E + 01 | 9.92E + 00 | -9.87E - 01 | -9.00E - 01 |
| 71-43-2   | Benzene                   | 1.21E + 08 | 7.52E + 01 | 7.52E + 01 | NaN        | NaN        | 2.13E + 00  | 2.80E + 00 | -1.19E + 01 | 4.00E + 01 | -8.16E - 01 | -3.31E - 01 |
| 71-55-6   | Methyl Chloroform         | 9.80E + 06 | 2.59E + 03 | 2.59E + 03 | NaN        | NaN        | 2.49E + 00  | 2.69E + 00 | -1.40E + 01 | 4.27E + 01 | -6.81E - 01 | 5.48E - 01  |
| 72-43-5   | Methoxychlor              | 6.56E + 00 | 2.20E + 01 | 2.20E + 01 | NaN        | NaN        | 5.08E + 00  | 9.67E + 00 | -1.05E + 01 | 1.91E + 02 | 1.17E + 00  | 1.08E + 00  |
| 74-83-9   | Methyl Bromide            | 9.42E + 05 | 1.85E - 01 | 8.09E + 01 | NaN        | NaN        | 1.19E + 00  | 1.86E + 00 | -1.35E + 01 | 1.54E + 01 | -6.58E - 01 | -5.79E - 01 |
| 74-87-3   | Methyl Chloride           | 1.26E + 06 | 3.16E + 01 | 3.16E + 01 | NaN        | NaN        | 9.10E - 01  | 1.38E + 00 | -1.34E + 01 | 1.68E + 01 | -6.03E - 01 | -5.20E - 01 |
| 75-00-3   | Ethyl Chloride            | 2.38E + 05 | 6.68E + 03 | 6.68E + 03 | NaN        | NaN        | 1.43E + 00  | 1.98E + 00 | -1.24E + 01 | 1.43E + 01 | -6.84E - 01 | -3.90E - 01 |
| 75-01-4   | Vinyl Chloride            | 3.87E + 05 | 4.18E + 00 | 3.48E - 01 | NaN        | NaN        | 1.46E + 00  | 1.68E + 00 | -1.12E + 01 | 7.60E + 01 | -5.04E - 01 | -4.73E - 01 |
| 75-05-8   | Acetonitrile              | 7.19E + 05 | 1.00E + 02 | 1.00E + 02 | NaN        | NaN        | -3.40E - 01 | 2.40E + 00 | -1.36E + 01 | 1.06E + 01 | -7.24E - 01 | -7.30E - 01 |
| 75-07-0   | Acetaldehyde              | 4.47E + 08 | 7.27E + 00 | 7.27E + 00 | NaN        | NaN        | -3.40E - 01 | 2.01E + 00 | -1.08E + 01 | 6.62E + 00 | -7.09E - 01 | -9.54E - 01 |
| 75-09-2   | Methylene Chloride        | 3.15E + 06 | 1.29E + 01 | 1.29E + 01 | NaN        | NaN        | 1.25E + 00  | 2.21E + 00 | -1.30E + 01 | 2.58E + 01 | -6.76E - 01 | -4.02E - 02 |
| 75-15-0   | Carbon Disulfide          | 4.13E + 06 | 1.06E + 00 | 4.07E + 01 | NaN        | NaN        | 1.94E + 00  | 2.25E + 00 | -1.15E + 01 | 1.52E + 01 | -6.66E - 01 | -4.97E - 01 |
| 75-25-2   | Bromoform                 | 1.60E + 04 | 1.97E + 01 | 1.97E + 01 | NaN        | NaN        | 2.40E + 00  | 4.02E + 00 | -1.28E + 01 | 3.37E + 01 | -5.16E - 01 | 3.20E - 01  |
| 75-35-4   | Vinylidene Chloride       | 1.70E + 04 | 2.96E + 01 | 7.04E + 00 | NaN        | NaN        | 2.13E + 00  | 2.35E + 00 | -1.10E + 01 | 2.20E + 01 | -5.53E - 01 | 6.12E - 02  |
| 75-56-9   | Propylene Oxide           | 2.49E + 05 | 1.21E + 00 | 1.21E + 00 | NaN        | NaN        | 3.00E - 02  | 2.39E + 00 | -1.23E + 01 | 1.31E + 01 | -8.35E - 01 | -5.50E - 01 |
| 76-44-8   | Heptachlor                | 2.77E + 00 | 2.86E + 00 | 2.86E + 00 | NaN        | NaN        | 5.47E + 00  | 7.58E + 00 | -1.02E + 01 | 1.72E + 03 | 1.70E + 00  | 2.63E + 00  |
| 77-47-4   | Hexachlorocyclopentadiene | 6.65E + 03 | 4.01E - 02 | 3.40E + 00 | NaN        | NaN        | 5.04E + 00  | 5.95E + 00 | -1.24E + 01 | 3.00E + 02 | 8.58E - 01  | 2.10E + 00  |

|         |                          |            |            |            |            |            |             |            |             |            |             |             |
|---------|--------------------------|------------|------------|------------|------------|------------|-------------|------------|-------------|------------|-------------|-------------|
| 78-59-1 | Isophorone               | 1.42E + 05 | 4.59E + 02 | 4.59E + 02 | NaN        | NaN        | 1.70E + 00  | 4.79E + 00 | -1.06E + 01 | 1.91E + 01 | -8.20E - 01 | -7.17E - 01 |
| 78-87-5 | Propylene Dichloride     | 3.26E + 04 | 2.71E - 01 | 2.71E - 01 | NaN        | NaN        | 1.98E + 00  | 2.95E + 00 | -1.23E + 01 | 2.29E + 01 | -6.48E - 01 | 1.39E - 02  |
| 79-00-5 | 1,1,2-Trichloroethane    | 6.89E + 04 | 2.41E + 00 | 2.41E + 00 | NaN        | NaN        | 1.89E + 00  | 3.36E + 00 | -1.27E + 01 | 2.84E + 01 | -5.83E - 01 | 4.94E - 01  |
| 79-06-1 | Acrylamide               | 1.75E + 04 | 2.20E - 01 | 2.20E - 01 | 9.26E + 00 | NaN        | -6.70E - 01 | 5.39E + 00 | -1.08E + 01 | 1.09E + 01 | -1.03E + 00 | -1.30E + 00 |
| 79-10-7 | Acrylic Acid             | 1.54E + 05 | 6.89E - 02 | 1.17E + 02 | 4.15E + 00 | NaN        | 3.50E - 01  | 4.50E + 00 | -1.08E + 01 | 5.94E + 00 | -1.07E + 00 | -1.30E + 00 |
| 79-46-9 | 2-Nitropropane           | 1.46E + 04 | 6.68E + 00 | 6.68E + 00 | NaN        | NaN        | 9.30E - 01  | 2.75E + 00 | -1.26E + 01 | 1.59E + 01 | -7.93E - 01 | -1.55E + 00 |
| 80-62-6 | Methyl Methacrylate      | 1.16E + 06 | 3.43E + 00 | 2.99E + 02 | NaN        | NaN        | 1.38E + 00  | 3.20E + 00 | -1.04E + 01 | 8.19E + 00 | -1.05E + 00 | -1.20E + 00 |
| 82-68-8 | Pentachloronitrobenzene  | 6.72E + 01 | 2.20E + 00 | 2.20E + 00 | NaN        | NaN        | 4.64E + 00  | 7.47E + 00 | -1.34E + 01 | 1.46E + 02 | 3.39E - 01  | 1.22E + 00  |
| 83-32-9 | Acenaphthene             | 2.41E + 05 | 1.08E + 02 | 1.08E + 02 | NaN        | NaN        | 3.92E + 00  | 6.19E + 00 | -1.00E + 01 | 2.45E + 01 | 1.64E - 01  | -6.56E - 01 |
| 84-74-2 | Dibutyl Phthalate        | 5.99E + 04 | 1.37E + 02 | 1.37E + 02 | NaN        | NaN        | 4.50E + 00  | 8.74E + 00 | -1.09E + 01 | 3.02E + 00 | -4.00E - 01 | -1.10E + 00 |
| 85-44-9 | Phthalic Anhydride       | 1.16E + 05 | 4.83E + 02 | 4.83E + 02 | NaN        | NaN        | 1.60E + 00  | 6.86E + 00 | -1.13E + 01 | 2.12E + 01 | -9.31E - 01 | -1.07E + 00 |
| 86-73-7 | Fluorene                 | 5.33E + 05 | 7.73E + 01 | 7.73E + 01 | NaN        | NaN        | 4.18E + 00  | 6.71E + 00 | -1.09E + 01 | 2.45E + 01 | 6.48E - 01  | -1.20E - 01 |
| 87-86-5 | Pentachlorophenol        | 2.07E + 03 | 6.60E + 00 | 6.60E + 00 | 6.95E + 00 | NaN        | 5.12E + 00  | 9.79E + 00 | -1.25E + 01 | 2.82E + 02 | 2.64E - 03  | 1.50E + 00  |
| 91-20-3 | Naphthalene              | 1.35E + 07 | 3.88E + 00 | 2.17E + 01 | NaN        | NaN        | 3.30E + 00  | 5.11E + 00 | -1.06E + 01 | 1.51E + 01 | 4.09E - 01  | -8.93E - 01 |
| 91-57-6 | 2-Methylnaphthalene      | 2.51E + 05 | 1.67E + 01 | 1.67E + 01 | NaN        | NaN        | 3.86E + 00  | 5.68E + 00 | -1.03E + 01 | 1.74E + 01 | 3.07E - 01  | -1.05E + 00 |
| 92-52-4 | Biphenyl                 | 2.21E + 05 | 5.50E + 01 | 5.50E + 01 | NaN        | NaN        | 4.01E + 00  | 6.03E + 00 | -1.11E + 01 | 2.10E + 01 | 6.21E - 01  | 2.78E - 01  |
| 92-87-5 | Benidine                 | 7.12E + 03 | 8.35E - 01 | 8.35E - 01 | NaN        | 4.79E + 00 | 1.34E + 00  | 9.18E + 00 | -1.01E + 01 | 6.65E + 01 | -6.72E - 01 | -8.72E - 01 |
| 94-75-7 | 2,4-Dichlorophenoxy Acet | 7.90E + 06 | 6.12E + 00 | 6.12E + 00 | 2.42E + 00 | NaN        | 2.81E + 00  | 8.94E + 00 | -1.11E + 01 | 2.22E + 01 | -5.42E - 01 | -8.49E - 01 |
| 95-48-7 | o-Cresol                 | 3.83E + 04 | 5.50E + 01 | 5.50E + 01 | 1.01E + 01 | NaN        | 1.95E + 00  | 5.65E + 00 | -1.04E + 01 | 1.53E + 01 | -7.49E - 01 | -1.59E + 00 |
| 95-95-4 | 2,4,5-Trichlorophenol    | 9.58E + 03 | 1.10E + 02 | 1.10E + 02 | 7.15E + 00 | NaN        | 3.72E + 00  | 7.63E + 00 | -1.15E + 01 | 8.38E + 01 | -2.40E - 01 | 3.76E - 01  |
| 96-12-8 | 1,2-Dibromo-3-Chloroprop | 1.66E + 02 | 1.42E - 01 | 1.42E - 01 | NaN        | NaN        | 2.96E + 00  | 4.81E + 00 | -1.24E + 01 | 2.81E + 01 | -7.08E - 01 | 3.78E - 01  |
| 96-45-7 | Ethylene Thiourea        | 1.67E + 02 | 2.39E + 00 | 2.39E + 00 | NaN        | 4.59E + 00 | -6.60E - 01 | 8.49E + 00 | -1.03E + 01 | 1.06E + 01 | -9.13E - 01 | -2.54E - 01 |
| 98-82-8 | Cumene                   | 9.16E + 05 | 3.63E + 02 | 1.21E + 02 | NaN        | NaN        | 3.66E + 00  | 3.99E + 00 | -1.12E + 01 | 1.64E + 01 | -2.41E - 01 | -7.53E - 01 |
| 98-86-2 | Acetophenone             | 1.84E + 05 | 4.65E + 02 | 4.65E + 02 | NaN        | NaN        | 1.58E + 00  | 4.69E + 00 | -1.16E + 01 | 6.00E + 00 | -6.63E - 01 | -1.10E + 00 |
| 98-95-3 | Nitrobenzene             | 1.16E + 04 | 1.26E + 00 | 1.26E + 00 | NaN        | NaN        | 1.85E + 00  | 4.36E + 00 | -1.29E + 01 | 3.17E + 01 | -7.31E - 01 | 2.07E + 00  |

**Table S3.** Comparison between PROTEX predicted air concentration ( $\mu\text{g}/\text{m}^3$ ) and predictions from U.S. EPA's National Air Toxics Assessment (NATA).

| CASRN    | Chemical name            | PROTEX prediction | NATA prediction <sup>a</sup> |            |             |
|----------|--------------------------|-------------------|------------------------------|------------|-------------|
|          |                          |                   | mean                         | 2.5th pctl | 97.5th pctl |
| 107-02-8 | Acrolein                 | 8.09E − 03        | 2.61E − 02                   | 5.75E − 03 | 6.71E − 02  |
| 127-18-4 | Tetrachloroethylene      | 1.18E − 01        | 2.09E − 02                   | 1.19E − 02 | 8.29E − 02  |
| 108-88-3 | Toluene                  | 1.24E + 00        | 8.57E − 01                   | 9.84E − 02 | 3.49E + 00  |
| 542-75-6 | 1,3-Dichloropropene      | 3.63E − 04        | 3.38E − 05                   | 0          | 1.93E − 02  |
| 71-43-2  | Benzene                  | 1.19E + 00        | 3.91E − 01                   | 1.28E − 01 | 9.45E − 01  |
| 50-00-0  | Formaldehyde             | 6.33E − 01        | 1.34E + 00                   | 6.59E − 01 | 2.24E + 00  |
| 77-47-4  | Hexachlorocyclopentadien | 9.06E − 05        | 7.25E − 09                   | 0          | 2.29E − 06  |
| 91-20-3  | Naphthalene              | 1.03E − 02        | 3.18E − 02                   | 5.45E − 03 | 1.04E − 01  |
| 56-23-5  | Carbon Tetrachloride     | 2.89E − 03        | 5.34E − 01                   | 4.56E − 01 | 5.52E − 01  |
| 75-07-0  | Acetaldehyde             | 4.38E − 01        | 1.03E + 00                   | 5.23E − 01 | 2.09E + 00  |

a. Concentrations are summarized from the 2014 National Air Toxics Assessment (<https://www.epa.gov/national-air-toxics-assessment/2014-nata-assessment-results>; accessed on July 08, 2021).

**Table S4.** Exposure as a fraction to ED50 and estimated risk for the 95 organic chemicals analyzed.

| CASRN     | Chemical name                | Average daily dose/ED <sub>50</sub> ratio |             |             | PrHE <sup>a</sup> |             |             |
|-----------|------------------------------|-------------------------------------------|-------------|-------------|-------------------|-------------|-------------|
|           |                              | 3-year-old                                | 14-year-old | 25-year-old | 3-year-old        | 14-year-old | 25-year-old |
| 100-41-4  | Ethyl Benzene                | 8.05E − 06                                | 2.80E − 06  | 2.57E − 06  | 8.85E − 86        | 1.68E − 101 | 7.74E − 103 |
| 100-42-5  | Styrene                      | 5.42E − 06                                | 1.88E − 06  | 1.73E − 06  | 1.64E − 91        | 8.77E − 108 | 4.05E − 109 |
| 106-46-7  | 1,4-Dichlorobenzene          | 1.12E − 06                                | 3.91E − 07  | 3.59E − 07  | 3.09E − 116       | 2.06E − 134 | 6.02E − 136 |
| 106-88-7  | 1,2-Epoxybutane              | 3.45E − 07                                | 1.19E − 07  | 1.06E − 07  | 1.15E − 136       | 1.43E − 156 | 8.09E − 159 |
| 106-89-8  | Epichlorohydrin              | 4.48E − 06                                | 1.54E − 06  | 1.35E − 06  | 2.44E − 94        | 5.31E − 111 | 3.76E − 113 |
| 106-93-4  | Ethylene Dibromide           | 1.25E − 07                                | 4.33E − 08  | 3.97E − 08  | 1.27E − 155       | 9.47E − 177 | 1.54E − 178 |
| 106-99-0  | 1,3-Butadiene                | 1.06E − 07                                | 3.67E − 08  | 3.37E − 08  | 8.09E − 159       | 3.62E − 180 | 6.06E − 182 |
| 107-02-8  | Acrolein                     | 5.47E − 03                                | 1.86E − 03  | 1.55E − 03  | 1.66E − 18        | 4.23E − 26  | 1.60E − 27  |
| 107-05-1  | Allyl Chloride               | 3.78E − 09                                | 1.31E − 09  | 1.20E − 09  | 1.65E − 230       | 4.09E − 256 | 2.70E − 258 |
| 107-13-1  | Acrylonitrile                | 3.50E − 06                                | 1.20E − 06  | 1.03E − 06  | 4.56E − 98        | 4.31E − 115 | 1.23E − 117 |
| 107-21-1  | Ethylene Glycol              | 1.71E − 09                                | 5.66E − 10  | 4.32E − 10  | 1.51E − 249       | 2.34E − 277 | 2.24E − 284 |
| 108-05-4  | Vinyl Acetate                | 6.37E − 07                                | 2.20E − 07  | 1.97E − 07  | 8.12E − 126       | 6.53E − 145 | 5.66E − 147 |
| 108-10-1  | Methyl Isobutyl Ketone       | 1.50E − 07                                | 5.21E − 08  | 4.75E − 08  | 3.99E − 152       | 5.78E − 173 | 7.51E − 175 |
| 108-31-6  | Maleic Anhydride             | 1.06E − 07                                | 3.67E − 08  | 3.25E − 08  | 8.09E − 159       | 3.62E − 180 | 1.06E − 182 |
| 108-39-4  | m-Cresol                     | 5.44E − 10                                | 1.89E − 10  | 1.73E − 10  | 2.21E − 278       | 2.09E − 306 | 0.00E + 00  |
| 108-88-3  | Toluene                      | 5.45E − 04                                | 1.89E − 04  | 1.74E − 04  | 1.91E − 36        | 8.34E − 47  | 1.05E − 47  |
| 108-90-7  | Chlorobenzene                | 2.97E − 06                                | 1.03E − 06  | 9.46E − 07  | 1.37E − 100       | 1.23E − 117 | 4.61E − 119 |
| 108-95-2  | Phenol                       | 3.99E − 07                                | 1.38E − 07  | 1.26E − 07  | 4.74E − 134       | 1.02E − 153 | 1.81E − 155 |
| 109-86-4  | Ethylene Glycol Methyl Ether | 1.61E − 09                                | 5.44E − 10  | 4.55E − 10  | 5.03E − 251       | 2.21E − 278 | 5.06E − 283 |
| 110-54-3  | Hexane                       | 1.68E − 05                                | 5.83E − 06  | 5.35E − 06  | 1.27E − 75        | 1.93E − 90  | 1.06E − 91  |
| 110-80-5  | Cellosolve Solvent           | 1.26E − 11                                | 4.28E − 12  | 3.56E − 12  | 0.00E + 00        | 0.00E + 00  | 0.00E + 00  |
| 114-26-1  | Propoxur                     | 6.01E − 13                                | 2.08E − 13  | 1.86E − 13  | 0.00E + 00        | 0.00E + 00  | 0.00E + 00  |
| 117-81-7  | Bis(2-Ethylhexyl)Phthalate   | 1.69E − 06                                | 5.88E − 07  | 5.40E − 07  | 1.70E − 109       | 3.31E − 127 | 1.08E − 128 |
| 118-74-1  | Hexachlorobenzene            | 6.83E − 07                                | 2.37E − 07  | 2.18E − 07  | 1.30E − 124       | 1.57E − 143 | 4.41E − 145 |
| 120-12-7  | Anthracene                   | 3.50E − 10                                | 1.21E − 10  | 1.12E − 10  | 6.59E − 290       | 1.24E − 318 | 8.88E − 321 |
| 120-82-1  | 1,2,4-Trichlorobenzene       | 1.61E − 06                                | 5.61E − 07  | 5.15E − 07  | 2.80E − 110       | 5.01E − 128 | 1.59E − 129 |
| 121-14-2  | 2,4-Dinitrotoluene           | 4.43E − 07                                | 1.54E − 07  | 1.41E − 07  | 3.47E − 132       | 1.27E − 151 | 2.62E − 153 |
| 121-44-8  | Triethylamine                | 1.13E − 08                                | 3.92E − 09  | 3.54E − 09  | 1.78E − 205       | 1.18E − 229 | 4.71E − 232 |
| 121-69-7  | N,N-Dimethylaniline          | 2.65E − 09                                | 9.22E − 10  | 8.46E − 10  | 6.13E − 239       | 6.68E − 265 | 4.47E − 267 |
| 123-31-9  | Hydroquinone                 | 8.79E − 10                                | 3.03E − 10  | 2.68E − 10  | 4.16E − 266       | 9.97E − 294 | 5.34E − 297 |
| 127-18-4  | Tetrachloroethylene          | 5.96E − 04                                | 2.07E − 04  | 1.90E − 04  | 1.25E − 35        | 7.08E − 46  | 9.20E − 47  |
| 129-00-0  | Pyrene                       | 1.03E − 07                                | 3.56E − 08  | 3.27E − 08  | 2.23E − 159       | 8.42E − 181 | 1.42E − 182 |
| 133-06-2  | Captan                       | 2.40E − 07                                | 8.33E − 08  | 7.65E − 08  | 2.69E − 143       | 1.50E − 163 | 3.08E − 165 |
| 133-90-4  | Chloramben                   | 1.47E − 15                                | 4.82E − 16  | 3.59E − 16  | 0.00E + 00        | 0.00E + 00  | 0.00E + 00  |
| 1582-09-8 | Trifluralin                  | 2.76E − 05                                | 9.57E − 06  | 8.79E − 06  | 3.87E − 69        | 2.48E − 83  | 1.57E − 84  |
| 1634-04-4 | Methyl Tert-Butyl Ether      | 5.85E − 08                                | 2.03E − 08  | 1.84E − 08  | 1.29E − 170       | 1.11E − 192 | 8.49E − 195 |

|          |                                |          |          |          |           |           |           |
|----------|--------------------------------|----------|----------|----------|-----------|-----------|-----------|
| 206-44-0 | Fluoranthene                   | 2.09E-08 | 7.26E-09 | 6.66E-09 | 4.70E-192 | 2.05E-215 | 2.22E-217 |
| 50-00-0  | Formaldehyde                   | 1.72E-04 | 5.89E-05 | 5.11E-05 | 7.75E-48  | 8.22E-60  | 1.66E-61  |
| 510-15-6 | Chlorobenzilate                | 1.12E-10 | 3.90E-11 | 3.58E-11 | 8.88E-321 | 0.00E+00  | 0.00E+00  |
| 51-28-5  | 2,4-Dinitrophenol              | 5.84E-09 | 1.94E-09 | 1.49E-09 | 2.17E-220 | 1.81E-246 | 6.25E-253 |
| 532-27-4 | 2-Chloroacetophenone           | 3.33E-06 | 1.16E-06 | 1.06E-06 | 7.90E-99  | 1.18E-115 | 3.73E-117 |
| 542-75-6 | 1,3-Dichloropropene            | 3.89E-04 | 1.35E-04 | 1.24E-04 | 1.33E-39  | 2.16E-50  | 2.43E-51  |
| 56-23-5  | Carbon Tetrachloride           | 8.69E-05 | 3.02E-05 | 2.77E-05 | 2.70E-55  | 5.40E-68  | 4.31E-69  |
| 56-38-2  | Parathion                      | 1.19E-10 | 4.14E-11 | 3.80E-11 | 4.27E-319 | 0.00E+00  | 0.00E+00  |
| 57-74-9  | Chlordane                      | 8.58E-09 | 2.98E-09 | 2.74E-09 | 1.24E-211 | 3.89E-236 | 3.86E-238 |
| 58-89-9  | 1,2,3,4,5,6-Hexachlorocy       | 2.66E-08 | 9.26E-09 | 8.50E-09 | 6.46E-187 | 6.42E-210 | 7.62E-212 |
| 593-60-2 | Vinyl Bromide                  | 5.87E-11 | 2.04E-11 | 1.86E-11 | 0.00E+00  | 0.00E+00  | 0.00E+00  |
| 62-53-3  | Aniline                        | 5.23E-09 | 1.81E-09 | 1.63E-09 | 6.19E-223 | 3.70E-248 | 1.01E-250 |
| 62-73-7  | Dichlorvos                     | 2.86E-09 | 9.92E-10 | 9.05E-10 | 4.08E-237 | 4.66E-263 | 2.27E-265 |
| 63-25-2  | Carbaryl                       | 5.33E-07 | 1.85E-07 | 1.70E-07 | 6.36E-129 | 3.74E-148 | 9.51E-150 |
| 67-56-1  | Methanol                       | 9.77E-07 | 3.36E-07 | 2.97E-07 | 1.61E-118 | 3.84E-137 | 2.20E-139 |
| 67-66-3  | Chloroform                     | 4.08E-05 | 1.42E-05 | 1.30E-05 | 3.05E-64  | 6.93E-78  | 4.35E-79  |
| 67-72-1  | Hexachloroethane               | 3.19E-05 | 1.11E-05 | 1.02E-05 | 2.65E-67  | 2.90E-81  | 1.93E-82  |
| 68-12-2  | N,N-Dimethylformamide          | 4.77E-09 | 1.62E-09 | 1.38E-09 | 4.54E-225 | 7.14E-251 | 7.98E-255 |
| 71-43-2  | Benzene                        | 3.67E-04 | 1.27E-04 | 1.17E-04 | 3.61E-40  | 4.93E-51  | 5.52E-52  |
| 71-55-6  | Methyl Chloroform              | 1.07E-06 | 3.73E-07 | 3.42E-07 | 5.35E-117 | 2.94E-135 | 8.03E-137 |
| 72-43-5  | Methoxychlor                   | 5.70E-12 | 1.98E-12 | 1.82E-12 | 0.00E+00  | 0.00E+00  | 0.00E+00  |
| 74-83-9  | Methyl Bromide                 | 2.03E-05 | 7.05E-06 | 6.40E-06 | 4.08E-73  | 1.11E-87  | 4.43E-89  |
| 74-87-3  | Methyl Chloride                | 1.61E-07 | 5.60E-08 | 5.13E-08 | 8.86E-151 | 1.69E-171 | 2.80E-173 |
| 75-00-3  | Ethyl Chloride                 | 3.07E-10 | 1.07E-10 | 9.75E-11 | 2.22E-293 | 4.74E-322 | 0.00E+00  |
| 75-01-4  | Vinyl Chloride                 | 8.05E-07 | 2.80E-07 | 2.57E-07 | 8.51E-122 | 1.85E-140 | 4.92E-142 |
| 75-05-8  | Acetonitrile                   | 3.80E-08 | 1.28E-08 | 1.05E-08 | 1.91E-179 | 1.02E-202 | 4.15E-207 |
| 75-07-0  | Acetaldehyde                   | 8.40E-05 | 2.84E-05 | 2.33E-05 | 1.11E-55  | 8.96E-69  | 2.57E-71  |
| 75-09-2  | Methylene Chloride             | 9.75E-06 | 3.38E-06 | 3.08E-06 | 4.52E-83  | 1.34E-98  | 4.99E-100 |
| 75-15-0  | Carbon Disulfide               | 3.59E-05 | 1.25E-05 | 1.14E-05 | 7.98E-66  | 1.26E-79  | 6.80E-81  |
| 75-25-2  | Bromoform                      | 3.74E-07 | 1.30E-07 | 1.19E-07 | 3.28E-135 | 7.25E-155 | 1.43E-156 |
| 75-35-4  | Vinylidene Chloride            | 3.86E-09 | 1.34E-09 | 1.23E-09 | 5.14E-230 | 1.49E-255 | 1.11E-257 |
| 75-56-9  | Propylene Oxide                | 4.62E-06 | 1.57E-06 | 1.33E-06 | 7.05E-94  | 1.09E-110 | 2.14E-113 |
| 76-44-8  | Heptachlor                     | 1.49E-11 | 5.19E-12 | 4.76E-12 | 0.00E+00  | 0.00E+00  | 0.00E+00  |
| 77-47-4  | Hexachlorocyclopentadiene      | 1.38E-04 | 4.79E-05 | 4.39E-05 | 3.47E-50  | 2.76E-62  | 2.40E-63  |
| 78-59-1  | Isophorone                     | 5.16E-09 | 1.79E-09 | 1.64E-09 | 3.02E-223 | 1.98E-248 | 1.43E-250 |
| 78-87-5  | Propylene Dichloride           | 4.34E-05 | 1.51E-05 | 1.38E-05 | 1.74E-63  | 4.70E-77  | 2.83E-78  |
| 79-00-5  | 1,1,2-Trichloroethane          | 1.20E-05 | 4.16E-06 | 3.81E-06 | 3.47E-80  | 1.89E-95  | 8.90E-97  |
| 79-06-1  | Acrylamide                     | 1.69E-08 | 5.65E-09 | 4.51E-09 | 1.22E-196 | 3.76E-221 | 2.25E-226 |
| 79-10-7  | Acrylic Acid                   | 3.21E-08 | 1.05E-08 | 7.84E-09 | 5.83E-183 | 4.15E-207 | 1.14E-213 |
| 79-46-9  | 2-Nitropropane                 | 3.90E-07 | 1.35E-07 | 1.22E-07 | 1.85E-134 | 3.85E-154 | 4.32E-156 |
| 80-62-6  | Methyl Methacrylate            | 2.81E-06 | 9.74E-07 | 8.88E-07 | 1.90E-101 | 1.43E-118 | 3.94E-120 |
| 82-68-8  | Pentachloronitrobenzene        | 1.63E-08 | 5.67E-09 | 5.21E-09 | 2.00E-197 | 4.53E-221 | 5.05E-223 |
| 83-32-9  | Acenaphthene                   | 6.81E-09 | 2.37E-09 | 2.17E-09 | 7.17E-217 | 1.27E-241 | 9.49E-244 |
| 84-74-2  | Dibutyl Phthalate              | 9.53E-09 | 3.31E-09 | 3.04E-09 | 2.83E-209 | 1.21E-233 | 1.16E-235 |
| 85-44-9  | Phthalic Anhydride             | 6.53E-09 | 2.27E-09 | 2.07E-09 | 7.88E-218 | 1.16E-242 | 6.83E-245 |
| 86-73-7  | Fluorene                       | 3.19E-07 | 1.11E-07 | 1.02E-07 | 4.40E-138 | 6.38E-158 | 1.44E-159 |
| 87-86-5  | Pentachlorophenol              | 2.28E-08 | 7.91E-09 | 7.26E-09 | 3.42E-190 | 1.81E-213 | 2.05E-215 |
| 91-20-3  | Naphthalene                    | 9.45E-05 | 3.28E-05 | 3.01E-05 | 2.40E-54  | 5.93E-67  | 4.90E-68  |
| 91-57-6  | 2-Methylnaphthalene            | 1.30E-07 | 4.53E-08 | 4.16E-08 | 7.25E-155 | 8.02E-176 | 1.42E-177 |
| 92-52-4  | Biphenyl                       | 3.81E-07 | 1.32E-07 | 1.21E-07 | 7.06E-135 | 1.42E-154 | 3.00E-156 |
| 92-87-5  | Benzidine                      | 4.55E-08 | 1.58E-08 | 1.44E-08 | 9.87E-176 | 4.20E-198 | 3.95E-200 |
| 94-75-7  | 2,4-Dichlorophenoxyacetic Acid | 3.34E-06 | 1.11E-06 | 8.62E-07 | 8.78E-99  | 2.19E-116 | 1.24E-120 |
| 95-48-7  | o-Cresol                       | 3.18E-09 | 1.11E-09 | 1.01E-09 | 1.36E-234 | 3.06E-260 | 1.32E-262 |
| 95-95-4  | 2,4,5-Trichlorophenol          | 6.39E-09 | 2.22E-09 | 2.04E-09 | 2.52E-218 | 3.37E-243 | 3.02E-245 |
| 96-12-8  | 1,2-Dibromo-3-Chloropropane    | 4.41E-07 | 1.53E-07 | 1.41E-07 | 2.88E-132 | 9.51E-152 | 2.62E-153 |
| 96-45-7  | Ethylene Thiourea              | 1.44E-12 | 4.79E-13 | 3.72E-13 | 0.00E+00  | 0.00E+00  | 0.00E+00  |
| 98-82-8  | Cumene                         | 3.10E-07 | 1.08E-07 | 9.88E-08 | 1.33E-138 | 1.87E-158 | 3.42E-160 |
| 98-86-2  | Acetophenone                   | 2.37E-08 | 8.24E-09 | 7.53E-09 | 2.29E-189 | 1.52E-212 | 1.39E-214 |

|         |              |            |            |            |            |             |             |
|---------|--------------|------------|------------|------------|------------|-------------|-------------|
| 98-95-3 | Nitrobenzene | 3.19E – 06 | 1.11E – 06 | 1.01E – 06 | 1.73E – 99 | 2.19E – 116 | 5.80E – 118 |
|         | Total        | 8.23E – 03 | 2.82E – 03 | 2.42E – 03 | 5.43E – 16 | 5.23E – 23  | 4.16E – 24  |

a. Values of 0 are very small values approximated to 0.

**Table S5.** Rankings for emissions, Kow, toxicity values, and estimated risks for 95 organic chemicals analyzed in this study.

| CASRN     | Name                     | Ranking                               |                                      |                |    |
|-----------|--------------------------|---------------------------------------|--------------------------------------|----------------|----|
|           |                          | EmissionED <sub>50</sub> , inhalation | ED <sub>50</sub> , dietary ingestion | Estimated risk |    |
| 100-41-4  | Ethyl Benzene            | 7                                     | 92                                   | 76             | 20 |
| 100-42-5  | Styrene                  | 9                                     | 61                                   | 91             | 21 |
| 106-46-7  | 1,4-Dichlorobenzene      | 34                                    | 82                                   | 81             | 32 |
| 106-88-7  | 1,2-Epoxybutane          | 73                                    | 24                                   | 20             | 45 |
| 106-89-8  | Epichlorohydrin          | 59                                    | 13                                   | 10             | 23 |
| 106-93-4  | Ethylene Dibromide       | 64                                    | 73                                   | 69             | 52 |
| 106-99-0  | 1,3-Butadiene            | 10                                    | 34                                   | 30             | 53 |
| 107-02-8  | Acrolein                 | 12                                    | 1                                    | 2              | 1  |
| 107-05-1  | Allyl Chloride           | 69                                    | 31                                   | 27             | 77 |
| 107-13-1  | Acrylonitrile            | 35                                    | 15                                   | 12             | 24 |
| 107-21-1  | Ethylene Glycol          | 8                                     | 86                                   | 86             | 81 |
| 108-05-4  | Vinyl Acetate            | 27                                    | 49                                   | 45             | 37 |
| 108-10-1  | Methyl Isobutyl Ketone   | 15                                    | 93                                   | 93             | 50 |
| 108-31-6  | Maleic Anhydride         | 52                                    | 58                                   | 55             | 53 |
| 108-39-4  | m-Cresol                 | 71                                    | 68                                   | 64             | 84 |
| 108-88-3  | Toluene                  | 4                                     | 75                                   | 83             | 3  |
| 108-90-7  | Chlorobenzene            | 30                                    | 72                                   | 68             | 28 |
| 108-95-2  | Phenol                   | 14                                    | 78                                   | 74             | 41 |
| 109-86-4  | Ethylene Glycol Methyl E | 46                                    | 54                                   | 50             | 82 |
| 110-54-3  | Hexane                   | 6                                     | 63                                   | 58             | 17 |
| 110-80-5  | Cellosolve Solvent       | 79                                    | 71                                   | 67             | 87 |
| 114-26-1  | Propoxur                 | 94                                    | 23                                   | 19             | 87 |
| 117-81-7  | Bis(2-Ethylhexyl)Phthala | 43                                    | 47                                   | 42             | 30 |
| 118-74-1  | Hexachlorobenzene        | 81                                    | 28                                   | 24             | 36 |
| 120-12-7  | Anthracene               | 47                                    | 91                                   | 92             | 85 |
| 120-82-1  | 1,2,4-Trichlorobenzene   | 55                                    | 65                                   | 60             | 31 |
| 121-14-2  | 2,4-Dinitrotoluene       | 77                                    | 21                                   | 17             | 39 |
| 121-44-8  | Triethylamine            | 48                                    | 55                                   | 51             | 66 |
| 121-69-7  | N,N-Dimethylaniline      | 75                                    | 36                                   | 32             | 80 |
| 123-31-9  | Hydroquinone             | 60                                    | 53                                   | 49             | 83 |
| 127-18-4  | Tetrachloroethylene      | 17                                    | 51                                   | 47             | 2  |
| 129-00-0  | Pyrene                   | 29                                    | 67                                   | 63             | 55 |
| 133-06-2  | Captan                   | 40                                    | 60                                   | 57             | 48 |
| 133-90-4  | Chloramben               | 95                                    | 42                                   | 37             | 87 |
| 1582-09-8 | Trifluralin              | 20                                    | 41                                   | 36             | 15 |
| 1634-04-4 | Methyl Tert-Butyl Ether  | 42                                    | 85                                   | 85             | 56 |
| 206-44-0  | Fluoranthene             | 33                                    | 76                                   | 71             | 63 |
| 50-00-0   | Formaldehyde             | 2                                     | 66                                   | 61             | 6  |
| 510-15-6  | Chlorobenzilate          | 89                                    | 39                                   | 34             | 89 |
| 51-28-5   | 2,4-Dinitrophenol        | 78                                    | 40                                   | 35             | 72 |
| 532-27-4  | 2-Chloroacetophenone     | 82                                    | 2                                    | 1              | 26 |
| 542-75-6  | 1,3-Dichloropropene      | 44                                    | 3                                    | 33             | 4  |
| 56-23-5   | Carbon Tetrachloride     | 49                                    | 14                                   | 11             | 9  |
| 56-38-2   | Parathion                | 90                                    | 17                                   | 14             | 88 |
| 57-74-9   | Chlordane                | 92                                    | 12                                   | 2              | 68 |
| 58-89-9   | 1,2,3,4,5,6-Hexachlorocy | 87                                    | 11                                   | 9              | 60 |
| 593-60-2  | Vinyl Bromide            | 86                                    | 32                                   | 28             | 87 |
| 62-53-3   | Aniline                  | 57                                    | 29                                   | 25             | 73 |
| 62-73-7   | Dichlorvos               | 88                                    | 6                                    | 8              | 79 |
| 63-25-2   | Carbaryl                 | 32                                    | 42                                   | 37             | 38 |



|         |                           |    |    |    |    |
|---------|---------------------------|----|----|----|----|
| 67-56-1 | Methanol                  | 1  | 90 | 90 | 34 |
| 67-66-3 | Chloroform                | 23 | 50 | 46 | 12 |
| 67-72-1 | Hexachloroethane          | 62 | 19 | 15 | 14 |
| 68-12-2 | N,N-Dimethylformamide     | 54 | 33 | 29 | 75 |
| 71-43-2 | Benzene                   | 5  | 74 | 70 | 5  |
| 71-55-6 | Methyl Chloroform         | 13 | 94 | 94 | 33 |
| 72-43-5 | Methoxychlor              | 91 | 58 | 55 | 87 |
| 74-83-9 | Methyl Bromide            | 24 | 8  | 73 | 16 |
| 74-87-3 | Methyl Chloride           | 21 | 64 | 59 | 49 |
| 75-00-3 | Ethyl Chloride            | 39 | 95 | 95 | 86 |
| 75-01-4 | Vinyl Chloride            | 31 | 38 | 7  | 35 |
| 75-05-8 | Acetonitrile              | 26 | 79 | 75 | 58 |
| 75-07-0 | Acetaldehyde              | 3  | 48 | 44 | 10 |
| 75-09-2 | Methylene Chloride        | 19 | 52 | 48 | 19 |
| 75-15-0 | Carbon Disulfide          | 18 | 18 | 62 | 13 |
| 75-25-2 | Bromoform                 | 67 | 57 | 53 | 44 |
| 75-35-4 | Vinylidene Chloride       | 66 | 62 | 43 | 76 |
| 75-56-9 | Propylene Oxide           | 37 | 20 | 16 | 22 |
| 76-44-8 | Heptachlor                | 93 | 30 | 26 | 87 |
| 77-47-4 | Hexachlorocyclopentadiene | 76 | 4  | 31 | 7  |
| 78-59-1 | Isophorone                | 51 | 87 | 87 | 74 |
| 78-87-5 | Propylene Dichloride      | 63 | 10 | 6  | 11 |
| 79-00-5 | 1,1,2-Trichloroethane     | 56 | 27 | 23 | 18 |
| 79-06-1 | Acrylamide                | 65 | 9  | 5  | 64 |
| 79-10-7 | Acrylic Acid              | 50 | 5  | 79 | 59 |
| 79-46-9 | 2-Nitropropane            | 68 | 46 | 41 | 42 |
| 80-62-6 | Methyl Methacrylate       | 22 | 35 | 84 | 29 |
| 82-68-8 | Pentachloronitrobenzene   | 85 | 25 | 21 | 65 |
| 83-32-9 | Acenaphthene              | 38 | 80 | 77 | 69 |
| 84-74-2 | Dibutyl Phthalate         | 58 | 83 | 82 | 67 |
| 85-44-9 | Phthalic Anhydride        | 53 | 89 | 89 | 70 |
| 86-73-7 | Fluorene                  | 28 | 76 | 71 | 46 |
| 87-86-5 | Pentachlorophenol         | 80 | 45 | 40 | 62 |
| 91-20-3 | Naphthalene               | 11 | 37 | 54 | 8  |
| 91-57-6 | 2-Methylnaphthalene       | 36 | 56 | 52 | 51 |
| 92-52-4 | Biphenyl                  | 41 | 68 | 64 | 43 |
| 92-87-5 | Benzidine                 | 74 | 16 | 13 | 57 |
| 94-75-7 | 2,4-Dichlorophenoxy Acet  | 16 | 44 | 39 | 25 |
| 95-48-7 | o-Cresol                  | 61 | 68 | 64 | 78 |
| 95-95-4 | 2,4,5-Trichlorophenol     | 72 | 81 | 78 | 71 |
| 96-12-8 | 1,2-Dibromo-3-Chloroprop  | 84 | 7  | 4  | 40 |
| 96-45-7 | Ethylene Thiourea         | 83 | 26 | 22 | 87 |
| 98-82-8 | Cumene                    | 25 | 84 | 80 | 47 |
| 98-86-2 | Acetophenone              | 45 | 88 | 88 | 61 |
| 98-95-3 | Nitrobenzene              | 70 | 22 | 18 | 27 |
